# Supplementary material for: Phase One of a Global Evaluation of Suction-Based Airway Clearance Devices in Foreign Body Airway Obstructions: A Retrospective Descriptive Analysis
Source: MDPI journal article supplement (doi:10.3390/ijerph19073846), 2022-03-24
Supplement: s1 [file s1]

## Supplementary File S1: Data collection tools used by device manufacturers

**Table S1.** LifeVac © online use reporting form data fields (16).

| Text Field                                                | Description Provided (if any) | Type of response |
|-----------------------------------------------------------|-------------------------------|------------------|
| Date of Incident                                          |                               | Date entry       |
| Location of Incident                                      |                               | Free text        |
| Patient                                                   | Name of patient               | Free text        |
| Any known medical conditions                              |                               | Free text        |
| Object that created the blockage                          |                               | Free text        |
| Partial or total blockage? (if known)                     |                               | Free text        |
| Was the Heimlich maneuver / back blows performed?         |                               | Yes or No choice |
| Was patient conscious at time of device use?              |                               | Yes or No choice |
| Number of times LifeVac was used? (Place, Push, Pulled)   |                               | Free text        |
| Outcome                                                   |                               | Free text        |
| Do you feel LifeVac saved the life of the person choking? |                               | Free text        |
| Your contact information to receive free LifeVac*         | Name, phone, email address    | Free text        |
| Your Address                                              | The user's address            | Free text        |
| How did you hear about LifeVac?                           |                               | Free text        |

**Table S2.** LifeVac © clinical evaluation report data fields.

|                                                                                |
|--------------------------------------------------------------------------------|
| Date                                                                           |
| Location                                                                       |
| Patient age / sex                                                              |
| Medical conditions                                                             |
| Nature / type of blockage (if known)                                           |
| Partial or total blockage (if known)                                           |
| BLS protocol first followed?                                                   |
| Patient conscious at time of device use?                                       |
| Position of patient when LifeVac applied?                                      |
| Number of uses of LifeVac attempted?                                           |
| Hazard successfully dislodged with LifeVac?                                    |
| Duration of patient choking until recovery?                                    |
| Outcome                                                                        |
| Did patient receive medical examination afterwards due to BLS being performed? |
| What complications were found, if any, from examination?                       |

## Supplementary File S2 – Standardized reporting tool used by researchers for data extraction

| <b>Data Field or Question</b>                                                    | <b>Response Type</b> | <b>Answer choices (if applicable)</b>                                                  |
|----------------------------------------------------------------------------------|----------------------|----------------------------------------------------------------------------------------|
| Assigned Number (by LifeVac LLC or DeChoker LLC)                                 | Numerical            |                                                                                        |
| Age                                                                              | Numerical            |                                                                                        |
| Date of Incident                                                                 | Free – text          |                                                                                        |
| Gender                                                                           | Multiple choice      | Male, female, other, not recorded                                                      |
| Geographical location of FBAO                                                    | Multiple choice      | Home, school/daycare, long term care/nursing home, other, not recorded                 |
| Medical comorbidities                                                            | Free – text          |                                                                                        |
| Types of medical comorbidities                                                   | Multiple choice      | Cardiac, respiratory, physical disability, neurocognitive disorder, other              |
| History of dysphagia / chewing / aspiration difficulty                           | Multiple choice      | Yes, no, not recorded                                                                  |
| Wheelchair use                                                                   | Multiple choice      | Yes, no, not recorded                                                                  |
| Foreign body description                                                         | Free – text          |                                                                                        |
| Foreign body type                                                                | Multiple choice      | Food, toy, other                                                                       |
| Degree of obstruction                                                            | Multiple choice      | Mild (partial, incomplete), severe (complete), not recorded                            |
| Data provided in report that supports degree of obstruction                      | Free - text          |                                                                                        |
| Level of consciousness of patient                                                | Multiple choice      | Alert, altered, unresponsive, not recorded                                             |
| Duration (approximate) of FBAO                                                   | Numeric              |                                                                                        |
| Were traditional techniques used before or after ACD use?                        | Multiple choice      | Yes, no, not recorded                                                                  |
| Description of non-ACD interventions (what technique, how many, before or after) | Free – text          |                                                                                        |
| Traditional techniques used pre-ACD (Select all that apply)                      | Multiple choice      | Abdominal thrusts, back blows, chest compressions / thrusts, finger sweep, other, none |

|                                                            |                 |                                                                           |
|------------------------------------------------------------|-----------------|---------------------------------------------------------------------------|
| CPR performed before or after ACD                          | Multiple choice | Yes, no, not recorded                                                     |
| Description of ACD user                                    | Free – text     |                                                                           |
| Training of ACD user                                       | Multiple choice | Healthcare worker, first aid trained, no first aid training, not recorded |
| Number of ACD attempts (one push/pull cycle = one attempt) | Numerical       |                                                                           |
| Patient position when ACD used                             | Free – text     |                                                                           |
| Did ACD relieve the FBAO?                                  | Multiple choice | Yes, no, not recorded                                                     |
| If the ACD did not relieve the FBAO, what did?             | Free – text     |                                                                           |
| Did the patient survive?                                   | Multiple choice | Yes, no, not recorded                                                     |
| Was EMS called?                                            | Multiple choice | Yes, no, not recorded                                                     |
| Did the patient go to the hospital?                        | Multiple choice | Yes, no, not recorded                                                     |
| Was the patient admitted to hospital?                      | Multiple choice | Yes, no, not recorded                                                     |
| Were there any adverse events?                             | Multiple choice | Yes, no, not recorded                                                     |
| Describe the adverse events.                               | Free – text     |                                                                           |
| Summarize the details of the incident and outcome          | Free – text     |                                                                           |
